# Supplementary material for: Complex role of chemical nature and tacticity in the adsorption free energy of carboxylic acid polymers at the oil–water interface: molecular dynamics simulations
Source: Royal Society of Chemistry journal article supplement (doi:10.1039/d3cp02754f), 2023-01-01
Supplement: d3cp02754f1.pdf [file d3cp02754f1.pdf]

## SUPPORTING INFORMATION

### **Complex role of chemical nature and tacticity on adsorption free energy of carboxylic acid polymers at oil-water interface: Molecular dynamics simulations**

Raviteja Kurapati, Upendra Natarajan\*

Macromolecular Modeling and Simulation Laboratory

Department of Chemical Engineering,

Indian Institute of Technology (IIT) Madras, Chennai 600036, India

Ph: 91-44-22574184, Fax: 91-44-22574150, 22574152

\*Corresponding Author: E-mail: [unatarajan@iitm.ac.in](mailto:unatarajan@iitm.ac.in)

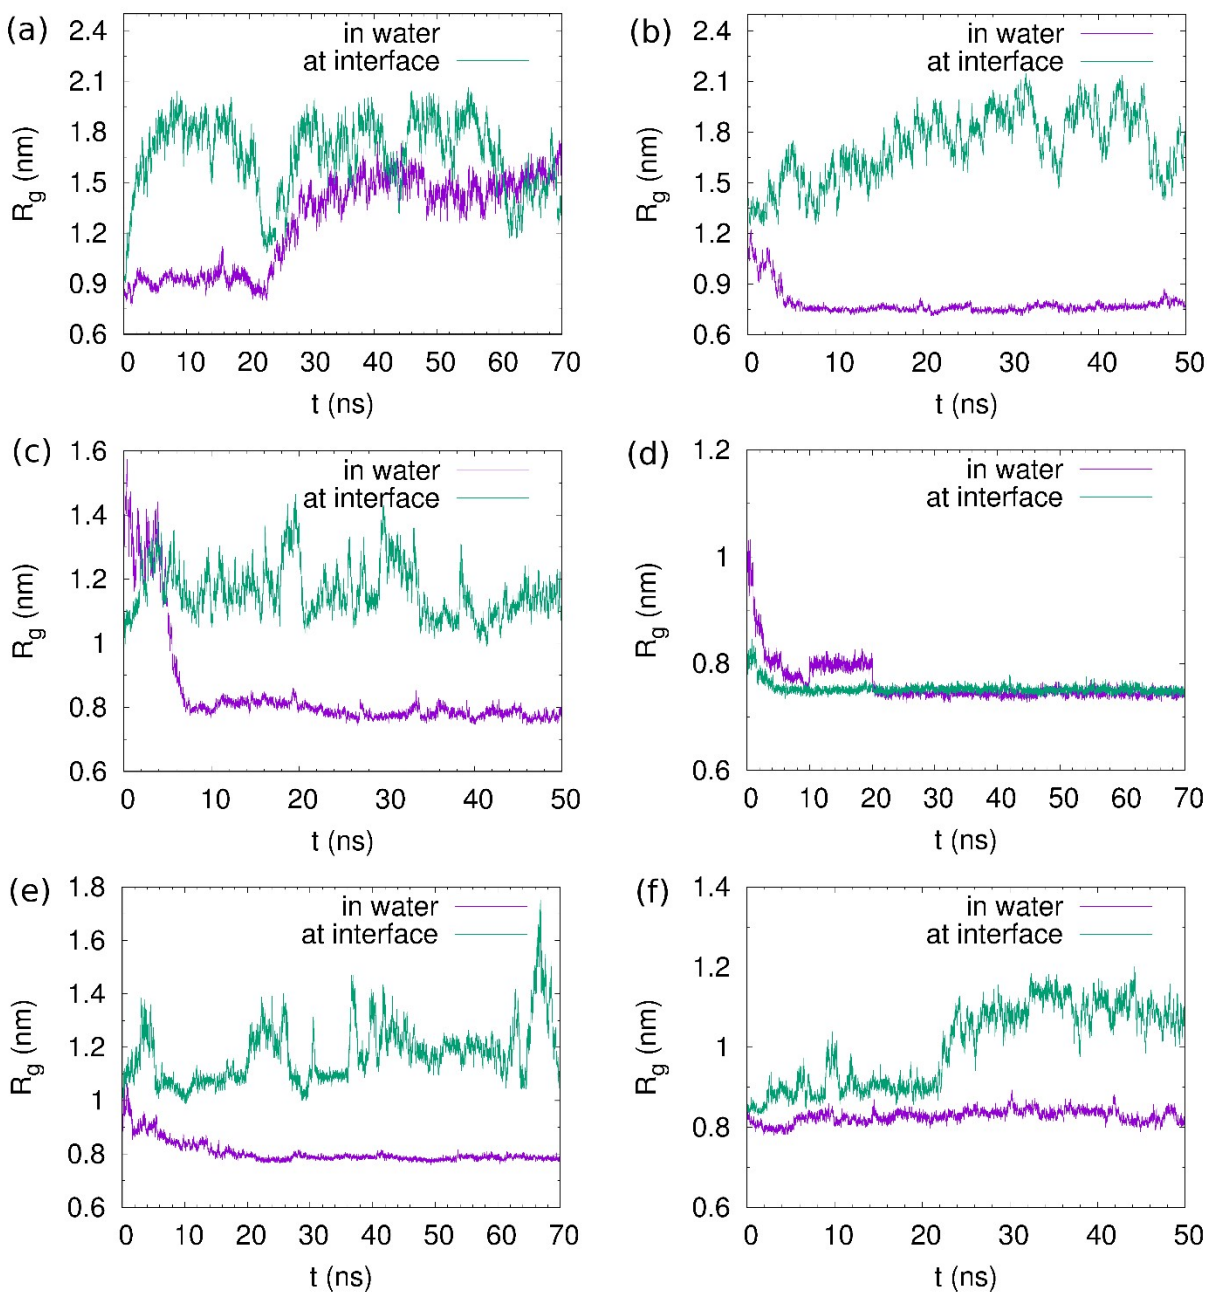

Figure S1. Radius of gyration of polymer as a function of time for umbrella sampling windows taken from end-points of reaction coordinate (i. e., polymer at the interface and in bulk aqueous phase): (a) i-PAA (b) s-PAA (c) i-PMA (d) s-PMA (e) a-PEA and (f) s-PEA.

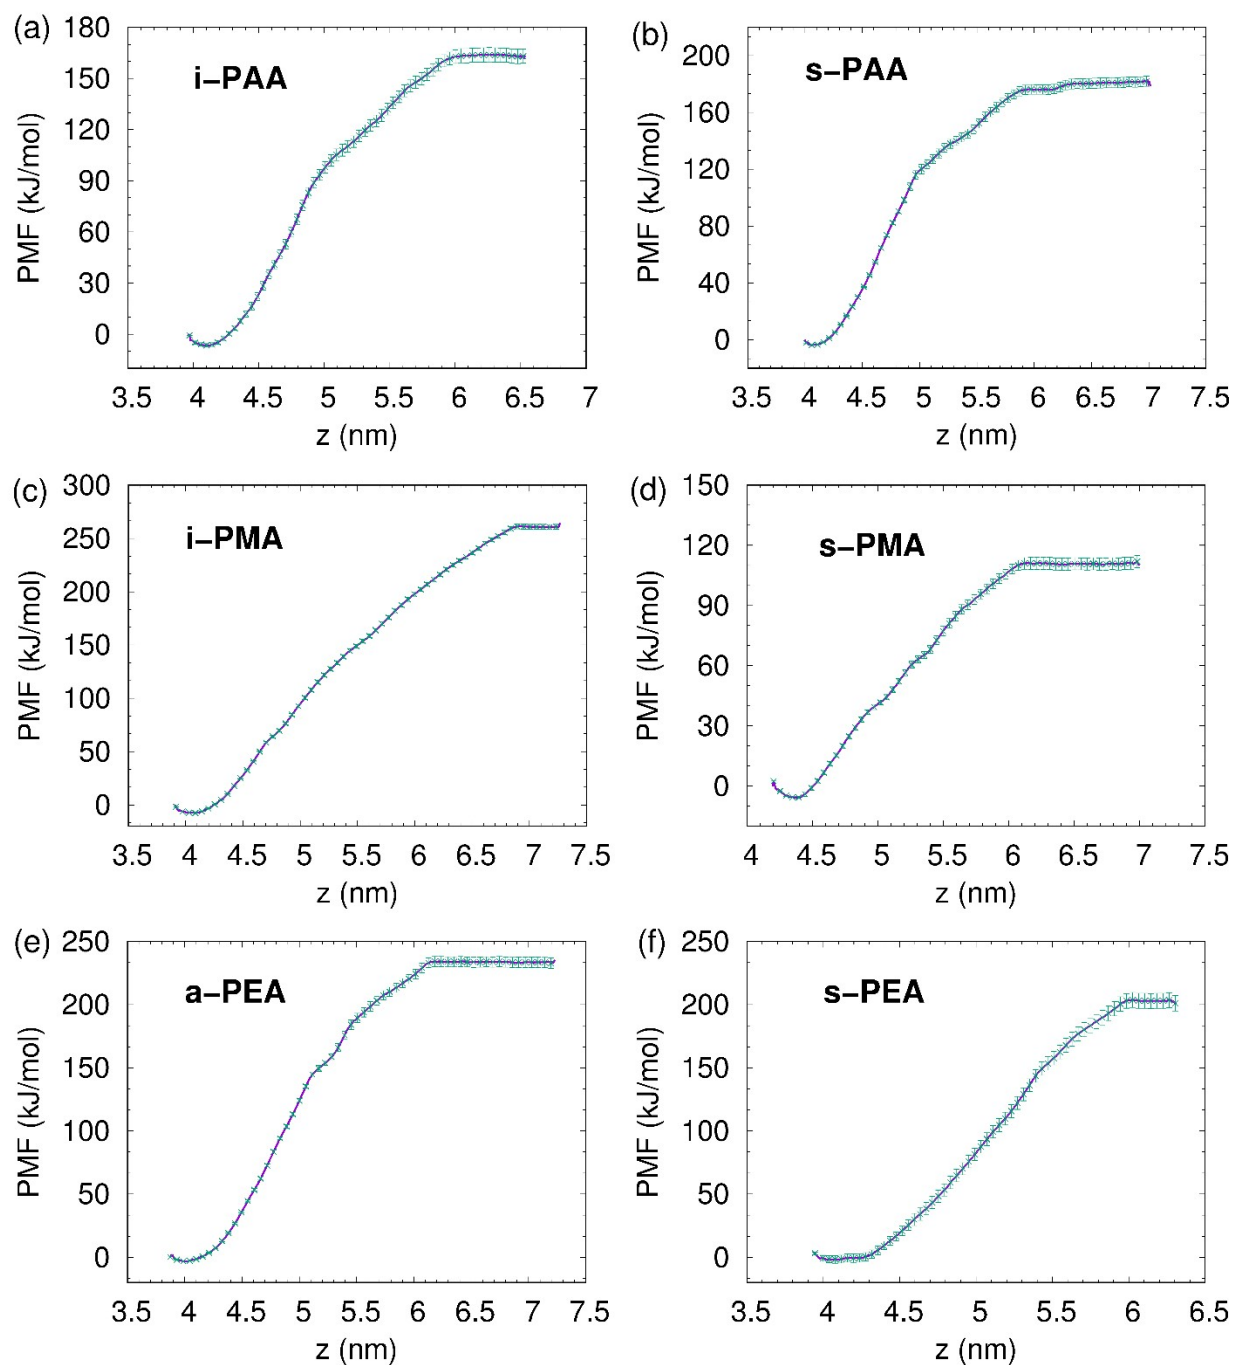

Figure S2. Error estimates for the PMF curves of adsorption of (a) i-PAA (b) s-PAA (c) i-PMA (d) s-PMA (e) a-PEA and (f) s-PEA at CCl<sub>4</sub>-water interface from aqueous phase. z-coordinate close to 4 nm indicate position of interface and close to 7 nm indicate bulk aqueous phase.

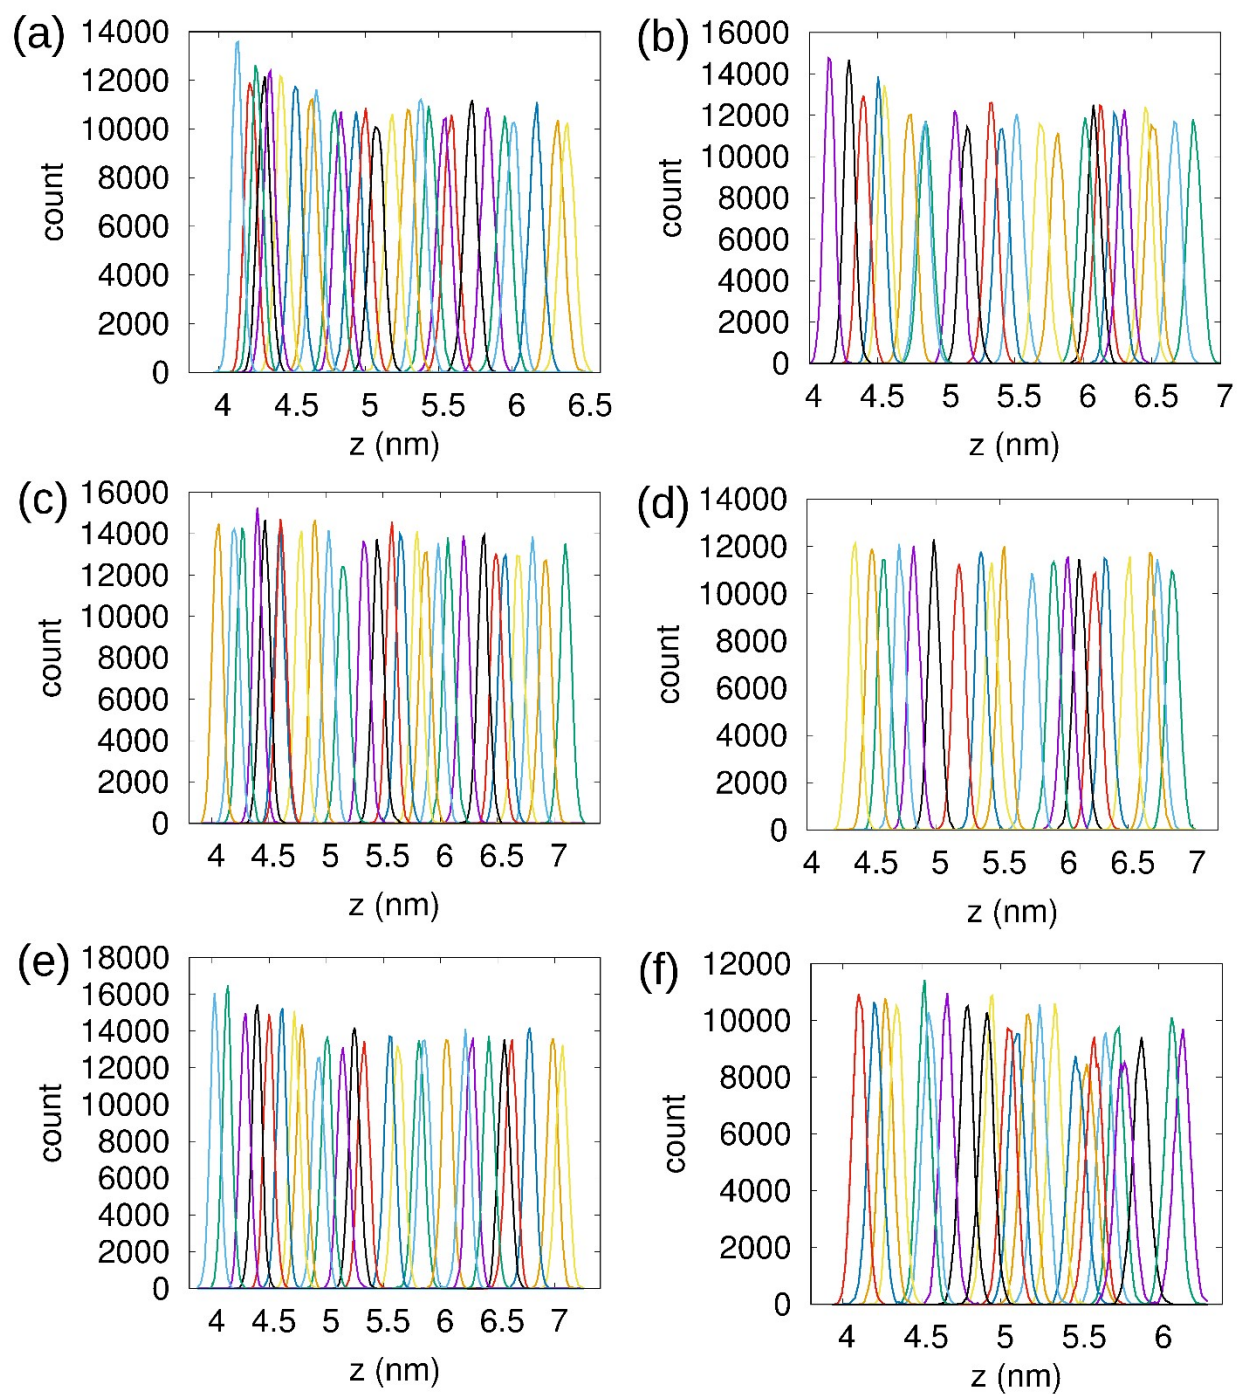

Figure S3. Histogram of umbrella sampling windows. Reaction coordinate ( $z$ ) is the distance between center of mass of polymer and the center of  $\text{CCl}_4$  phase. (a) i-PAA (b) s-PAA (c) i-PMA (d) s-PMA (e) a-PEA and (f) a-PEA.

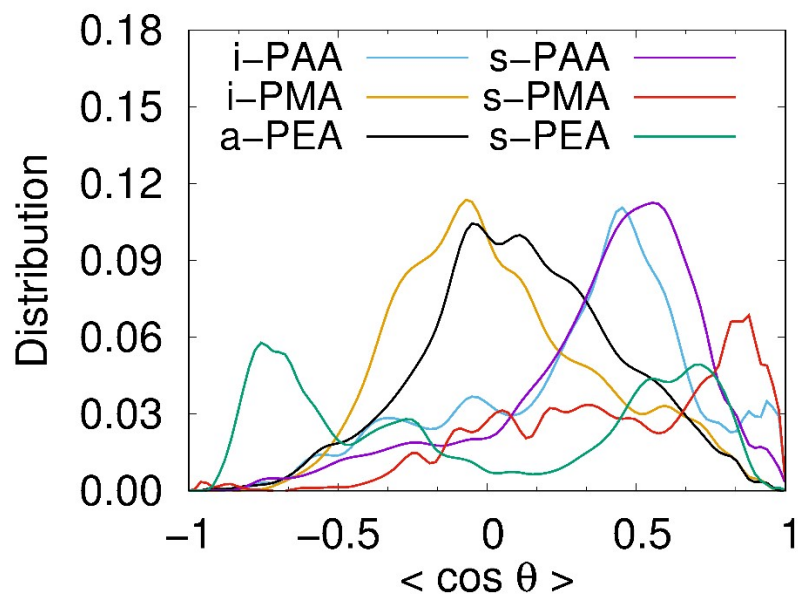

Figure S4. Orientation distribution of backbone C-C\* bonds. C\* represent substituted carbon.  $\theta$  is angle made by bond with respect to the interface normal pointed towards aqueous phase.

Table S1. Change in Gibbs free energy ( $\Delta G_{\text{ads}}$ ), enthalpy ( $\Delta H_{\text{ads}}$ ) and entropy ( $\Delta S_{\text{ads}}$ ) due to adsorption of polymer at the  $\text{CCl}_4$ -water interface.

| Polymer       | $\Delta G_{\text{ads}}$ (kJ/mol) | $\Delta H_{\text{ads}}$ (kJ/mol) | $\Delta S_{\text{ads}}$ (kJ/mol) |
|---------------|----------------------------------|----------------------------------|----------------------------------|
| <i>i</i> -PAA | $-170.33 \pm 4.15$               | $-396.86 \pm 42.93$              | $-0.76 \pm 0.14$                 |
| <i>s</i> -PAA | $-184.97 \pm 3.52$               | $-480.15 \pm 52.58$              | $-0.98 \pm 0.18$                 |
| <i>i</i> -PMA | $-268.96 \pm 2.28$               | $-578.48 \pm 15.68$              | $-1.03 \pm 0.05$                 |
| <i>s</i> -PMA | $-116.48 \pm 3.02$               | $-256.85 \pm 57.85$              | $-0.47 \pm 0.19$                 |
| <i>a</i> -PEA | $-236.63 \pm 4.04$               | $-660.08 \pm 48.67$              | $-1.41 \pm 0.16$                 |
| <i>s</i> -PEA | $-203.25 \pm 5.95$               | $-483.94 \pm 54.97$              | $-0.94 \pm 0.18$                 |

Table S2. Probability of backbone torsion angles for transition between *trans*, *gauche positive* and *gauche negative* states.

| Polymer       | Probability for transition |
|---------------|----------------------------|
| <i>i</i> -PAA | 0.023                      |
| <i>s</i> -PAA | 0.017                      |
| <i>i</i> -PMA | 0.005                      |
| <i>s</i> -PMA | 0.012                      |
| <i>a</i> -PEA | 0.022                      |
| <i>s</i> -PEA | 0.020                      |

The probability for transition of dihedral between different states is obtained by counting number of dihedral transitions out of total number of frames used for sampling (5000 frames).

Table S3. Average fraction of backbone dihedrals of adsorbed polymer in different dihedral states.

| Polymer       | <i>trans</i> | <i>g</i> <sup>+</sup> ( $0^\circ < \phi < 120^\circ$ ) | <i>g</i> <sup>-</sup> ( $-120^\circ < \phi < 0^\circ$ ) |
|---------------|--------------|--------------------------------------------------------|---------------------------------------------------------|
| <i>i</i> -PAA | 0.73         | 0.17                                                   | 0.10                                                    |
| <i>s</i> -PAA | 0.83         | 0.11                                                   | 0.06                                                    |
| <i>i</i> -PMA | 0.96         | 0.01                                                   | 0.03                                                    |
| <i>s</i> -PMA | 0.94         | 0.04                                                   | 0.02                                                    |
| <i>a</i> -PEA | 0.77         | 0.15                                                   | 0.08                                                    |
| <i>s</i> -PEA | 0.47         | 0.32                                                   | 0.21                                                    |

Table S4. Change in number of hydrogen bonds per chain ( $\Delta N_{\text{HB}}$ ) between different pairs: Intrachain (P-P), polymer-water (P-W) and water-water (W-W).

| Polymer       | $\Delta N_{\text{HB}}$ (P-P) | $\Delta N_{\text{HB}}$ (P-W) | $\Delta N_{\text{HB}}$ (W-W) |
|---------------|------------------------------|------------------------------|------------------------------|
| <i>i</i> -PAA | $-0.33 \pm 0.82$             | $-2.12 \pm 1.75$             | $14.50 \pm 3.37$             |
| <i>s</i> -PAA | $-1.12 \pm 0.35$             | $-0.44 \pm 0.92$             | $21.70 \pm 2.15$             |
| <i>i</i> -PMA | $1.84 \pm 0.01$              | $-8.25 \pm 0.20$             | $19.29 \pm 2.29$             |
| <i>s</i> -PMA | $1.28 \pm 0.13$              | $-5.61 \pm 0.46$             | $14.25 \pm 1.54$             |
| <i>a</i> -PEA | $-0.72 \pm 0.52$             | $-4.29 \pm 0.94$             | $33.62 \pm 1.11$             |
| <i>s</i> -PEA | $-2.46 \pm 0.61$             | $1.64 \pm 1.27$              | $13.95 \pm 3.70$             |

## Umbrella Sampling MD Simulation Steps

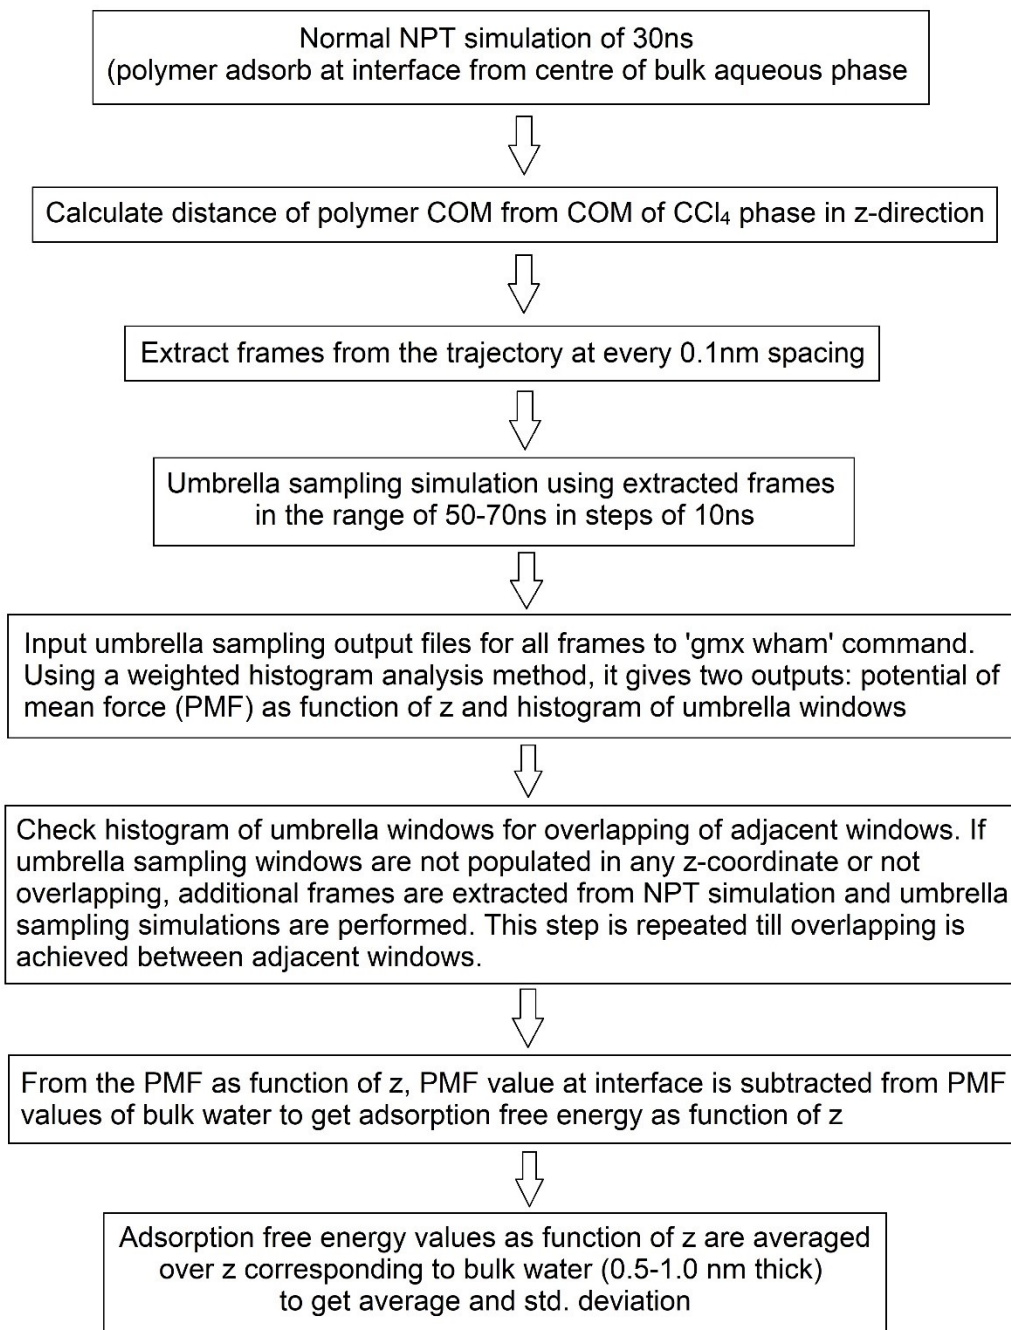

Scheme 1. Flowchart showing the steps followed for carrying out umbrella sampling MD simulations.
